# Supplementary material for: A genome-wide association study identifies variants in KCNIP4 associated with ACE inhibitor-induced cough
Source: PubMed Central journal article supplement — Pharmacogenomics J. 2015 Jul 14;16(3):231–7. doi: 10.1038/tpj.2015.51 (PMC4713364; doi:10.1038/tpj.2015.51), 2015-07-14
Supplement: NIHMS697384-supplement-2.pdf [file NIHMS697384-supplement-2.pdf]

# Supplemental figure 1

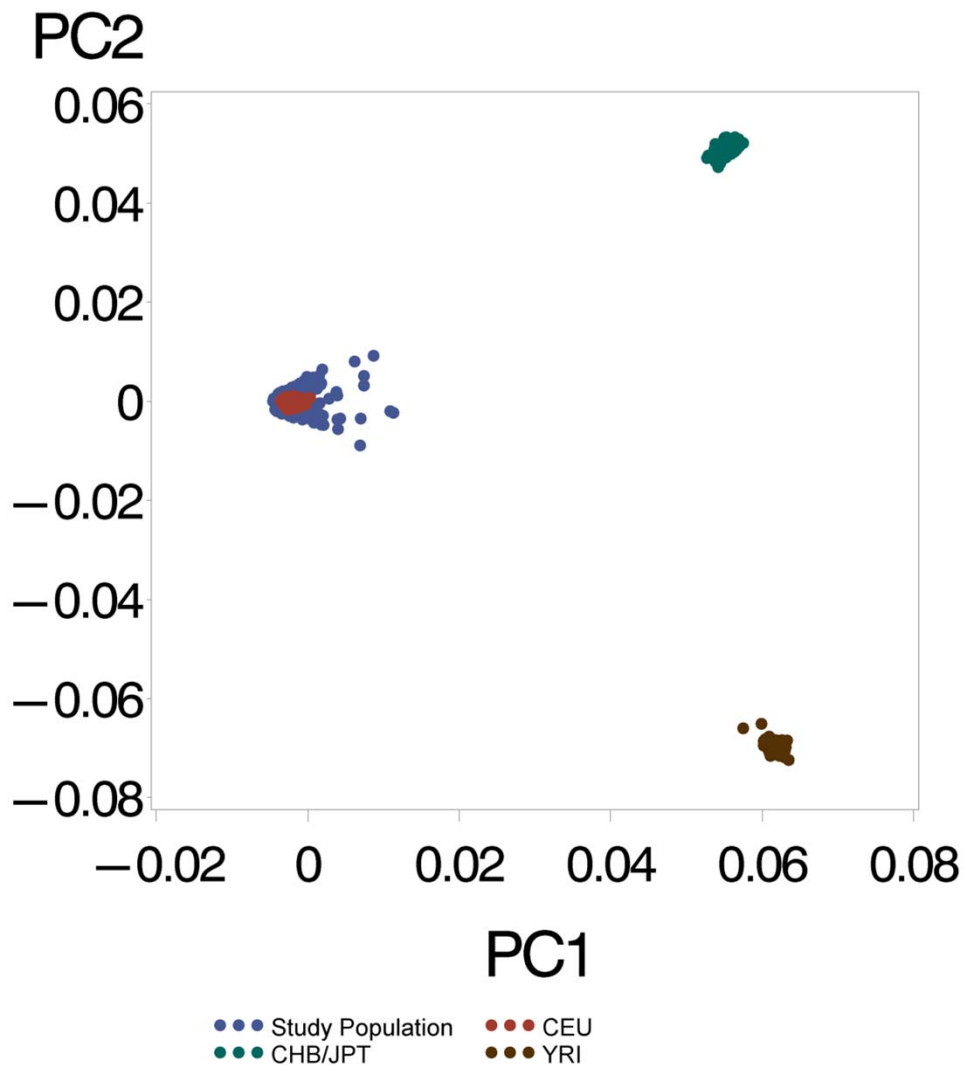

**Supplemental Figure 1.** Scatter plot for a principal component analysis comparing the STRUCTURE-defined EA study subjects with HAPMAP subjects. Principal components were fit for a data set that include eMERGE EA study population and the CEU, YRI and CHB/JPT HAPMAP populations. The graph shows the first 2 principal components. The eMERGE EAs are clustered tightly around the CEU population.

# Supplemental figure 2

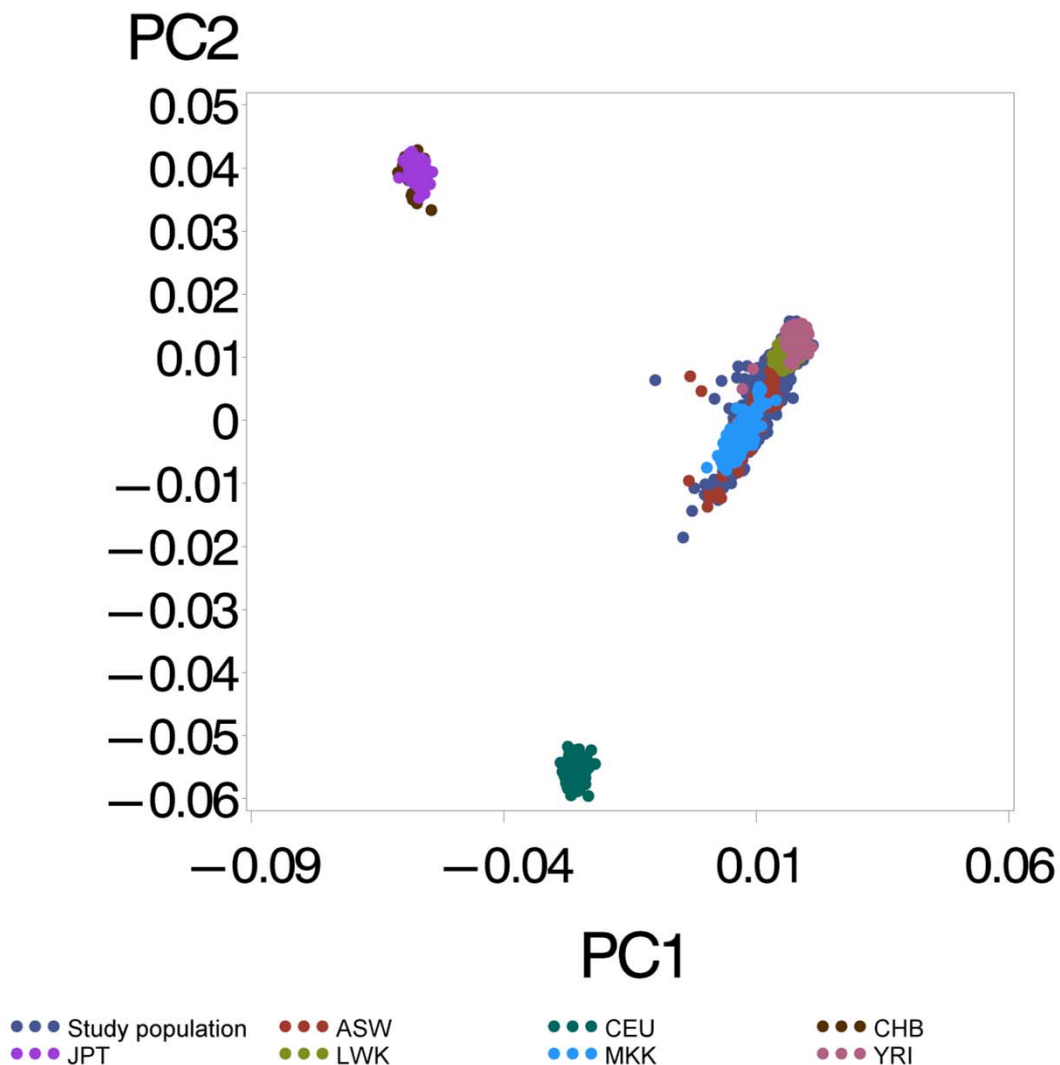

**Supplemental Figure 2.** Scatter plot for a principal component analysis comparing the STRUCTURE-defined AA study subjects with HAPMAP subjects. Principal components were fit for a data set that include eMERGE AA study population and the ASW, LWK, MKK, CEU, YRI and CHB/JPT HAPMAP populations. The graph shows the first 2 principal components. The eMERGE AAs are clustered around the ASW, LWK, MKK, and YRI populations.

# Supplemental figure 3

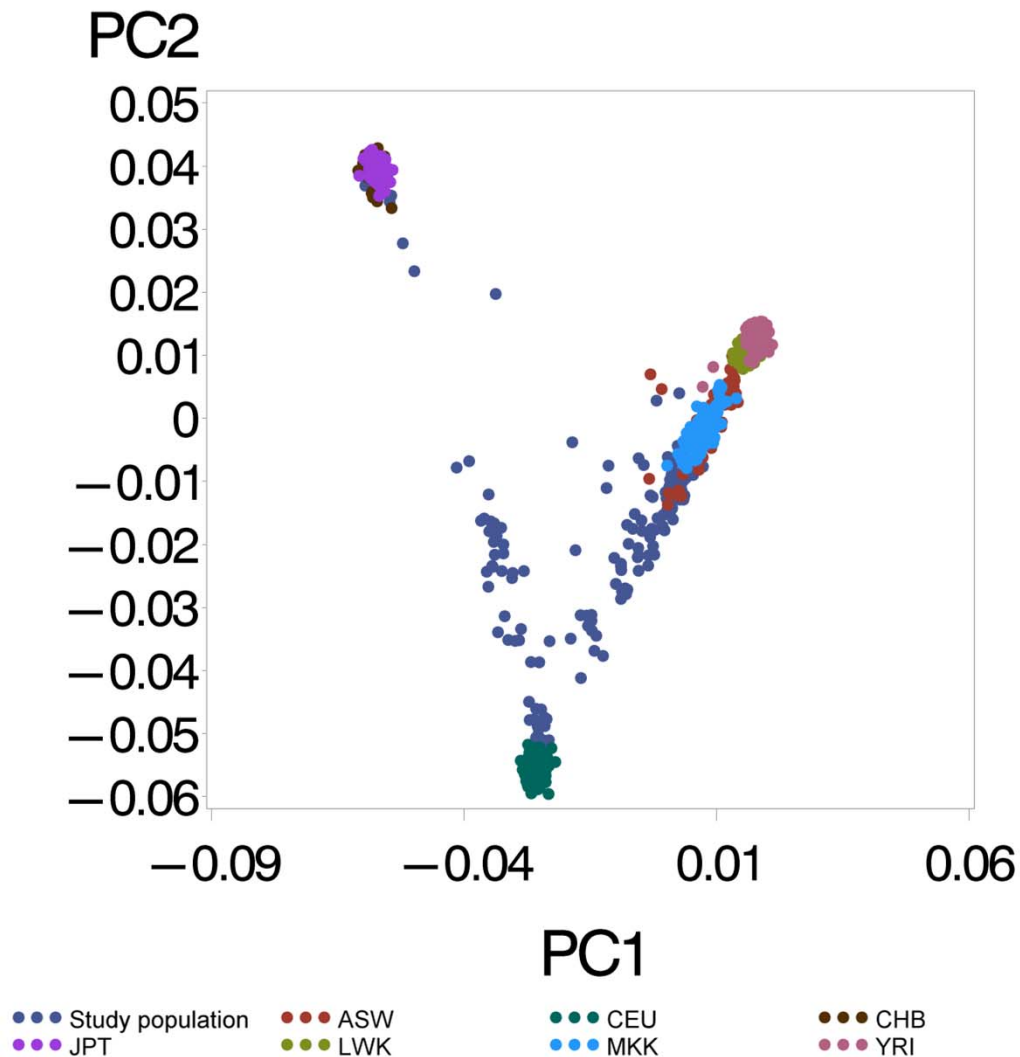

**Supplemental Figure 3.** Scatter plot for a principal component analysis comparing the study subjects who did not fall into the EA or AA STRUCTURE-defined clusters with HAPMAP subjects. Principal components were fit for a data set that included the study subjects and the ASW, LWK, MKK, CEU, YRI and CHB/JPT HAPMAP populations. The graph shows the first 2 principal components.

# Supplemental figure 4

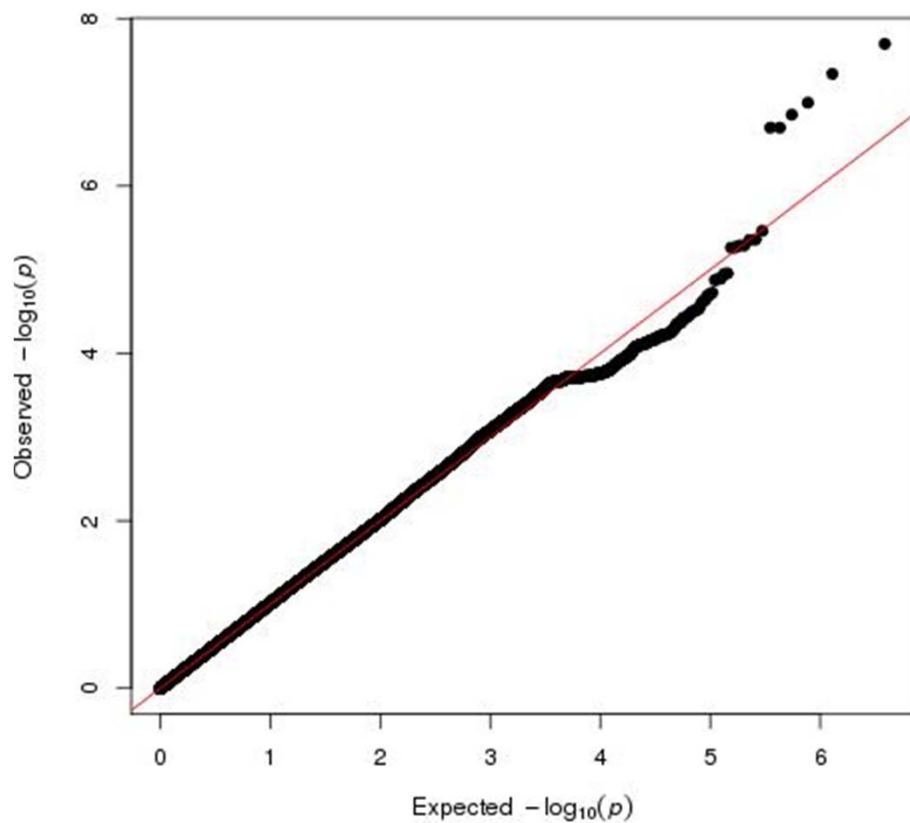

**Supplemental Figure 4.** A QQ plot for SNP associations from a GWAS of ACE-inhibitor induced cough using an additive model adjusted for 10 PCs, birth year and sex.

# Supplemental figure 5

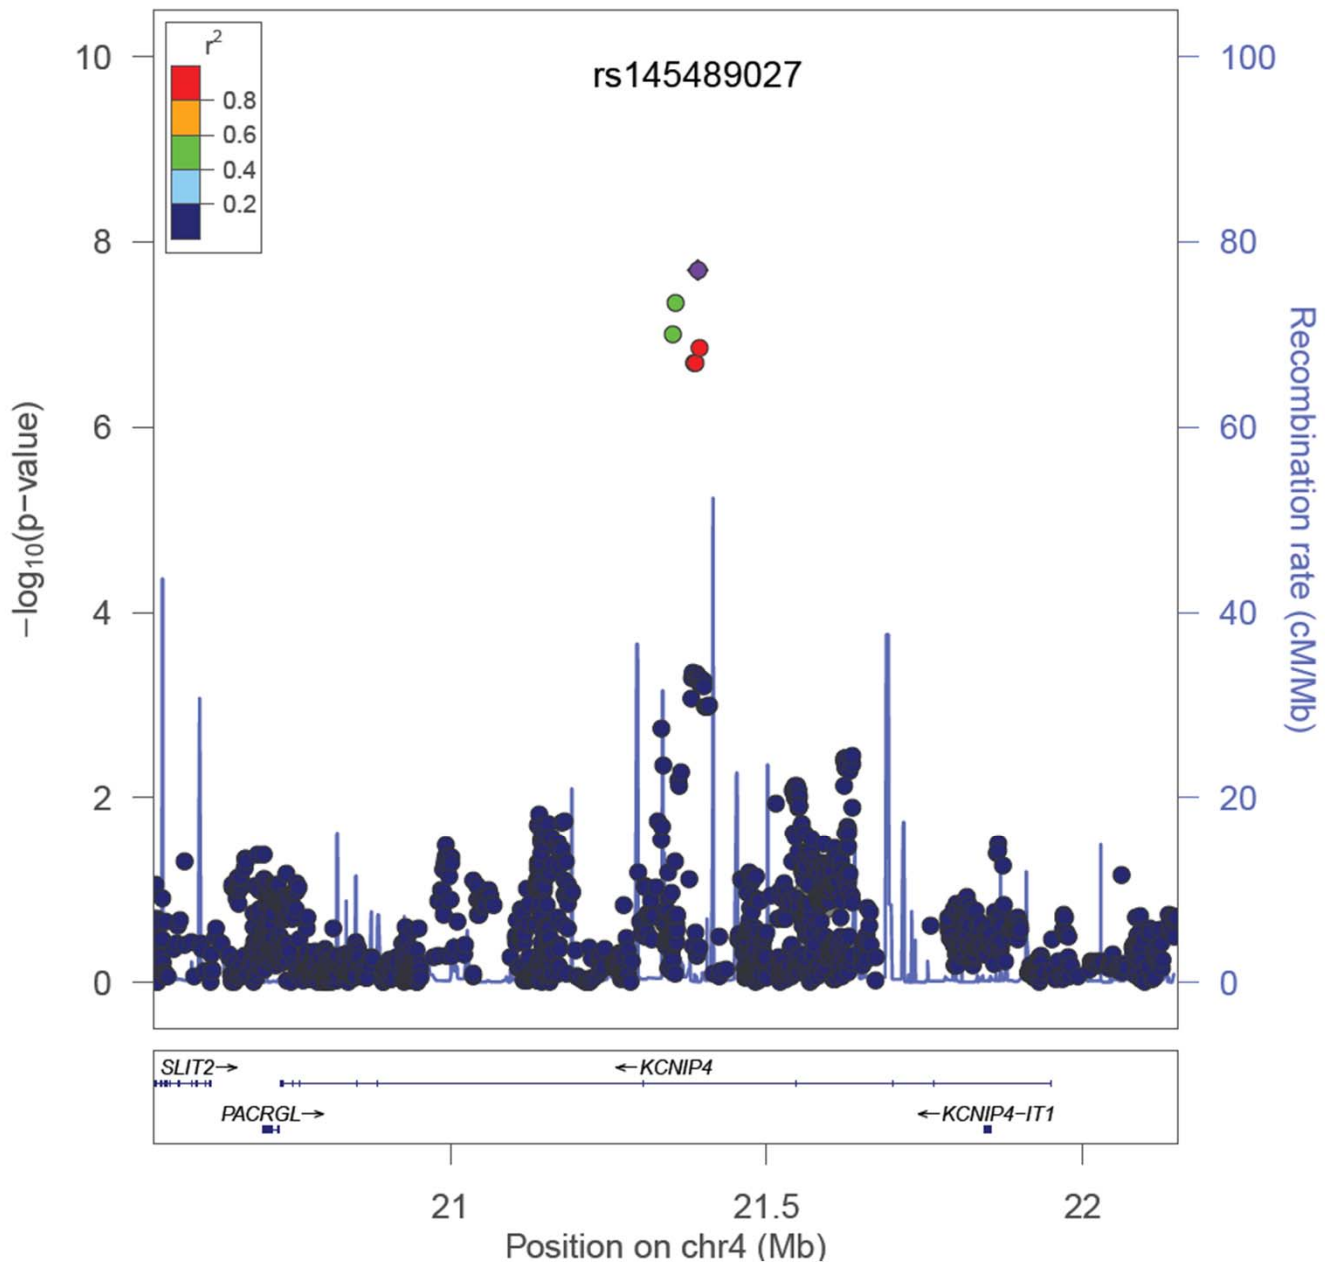

**Supplemental Figure 5.** LocusZoom plot of most strongly associated SNPs from GWAS located in the region of *KCNIP4* (chr4:20330238–22350374), centered around SNP rs145489027 (shown in purple). Linkage disequilibrium (based on  $r^2$  values) with respect to rs145489027 are based on a 1000 Genomes African reference population. Imputed SNPs are denoted by squares and genotyped SNPs by circles.

# Supplemental figure 6

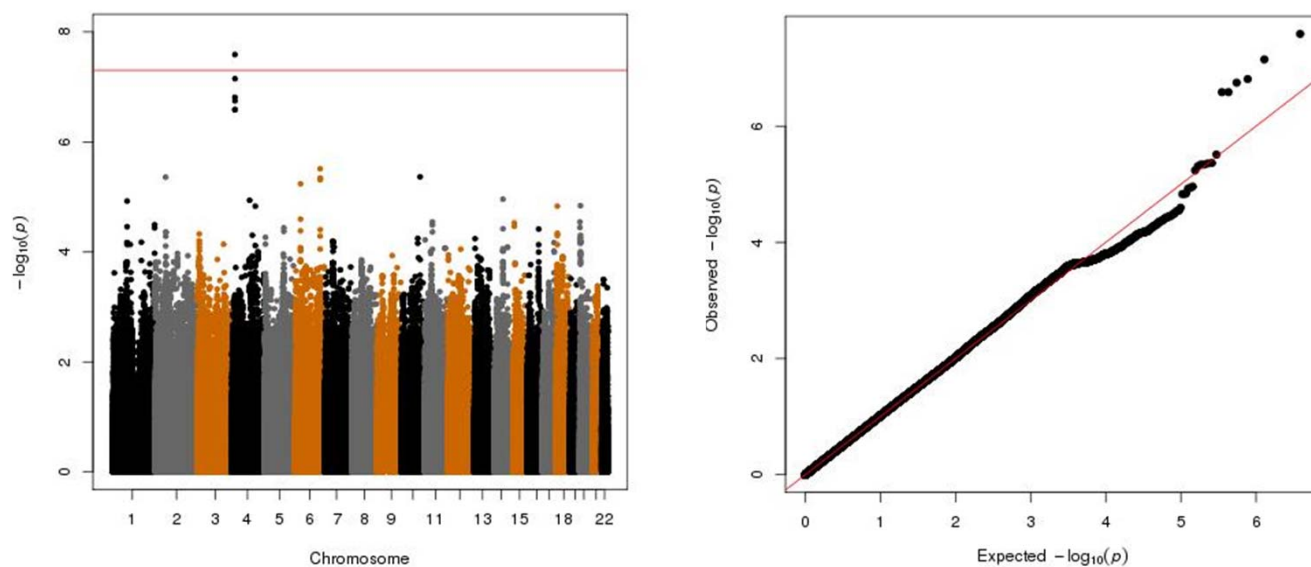

**Supplemental Figure 6.** Manhattan and QQ plots for SNP associations from a GWAS of ACE-inhibitor induced cough using an additive model adjusted for 10 PCs, birth year, sex, smoking status and cough risk factors.

# Supplemental figure 7

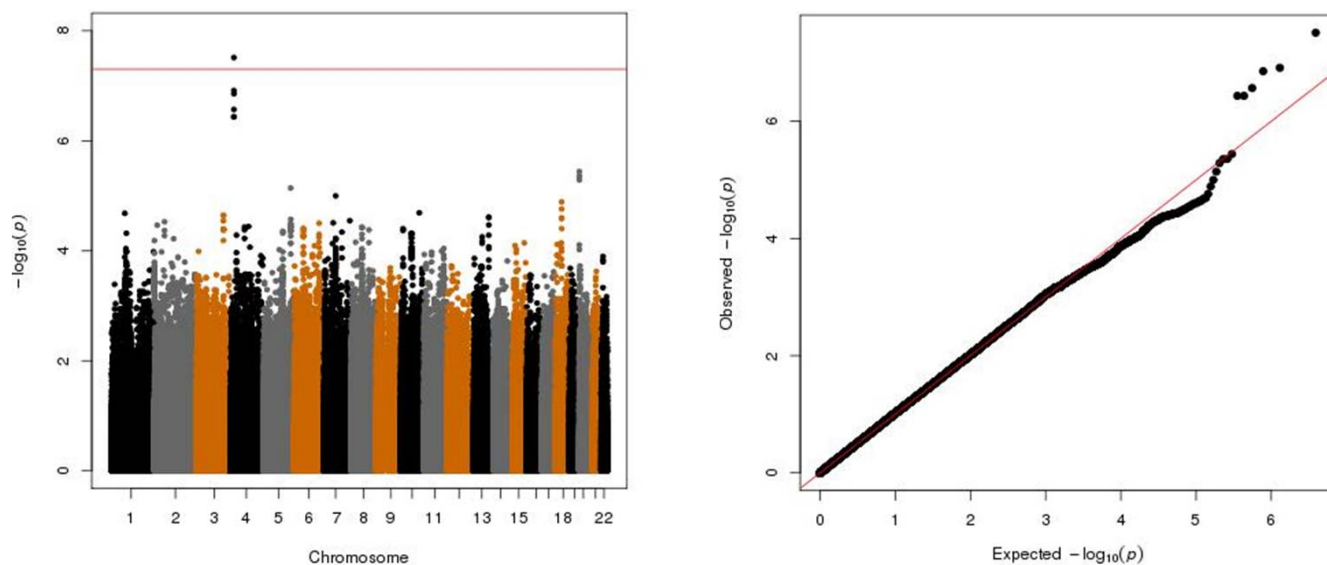

**Supplemental Figure 7.** Manhattan and QQ plots for SNP associations from a GWAS of ACE-inhibitor induced cough using an additive model that excludes subjects with lung disease and is adjusted for 10 PCs, birth year, sex, smoking status and cough risk factors.
